# Supplementary material
Source: Springer Nature journal article supplement (https://www.springermedizin.de/resource/supplementary/12891_2012_1703_MOESM2_ESM.pdf/9508396)

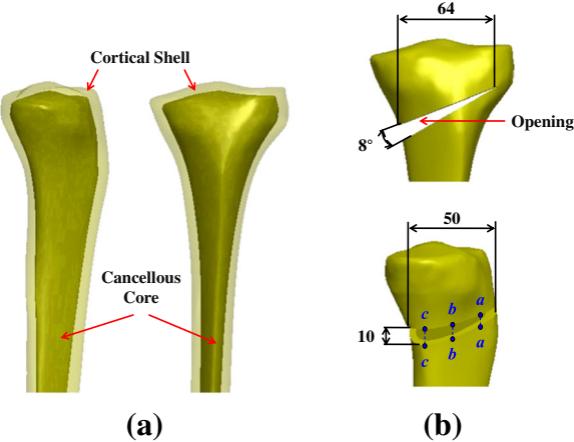

Supplement: MOESM2 [file 9508396]
